# Supplementary figures and images for: RNase III-mediated processing of a trans-acting bacterial sRNA and its cis-encoded antagonist
Source: eLife journal article supplement (doi:10.7554/elife.69064), 2021-11-29

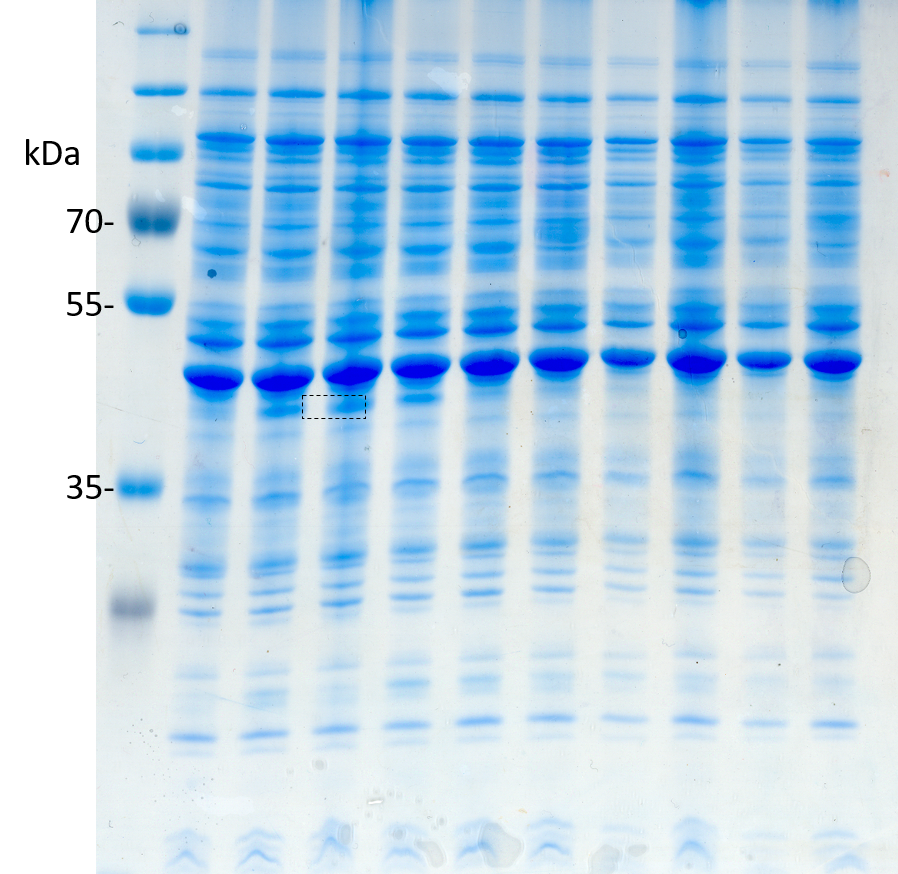

Supplement: fig1-figsupp1-data1 [file Source data - Figure 1 - Figure supplement 1.docx]

**Source data for Figure 2 – figure supplement 2**

**Panel A**

**
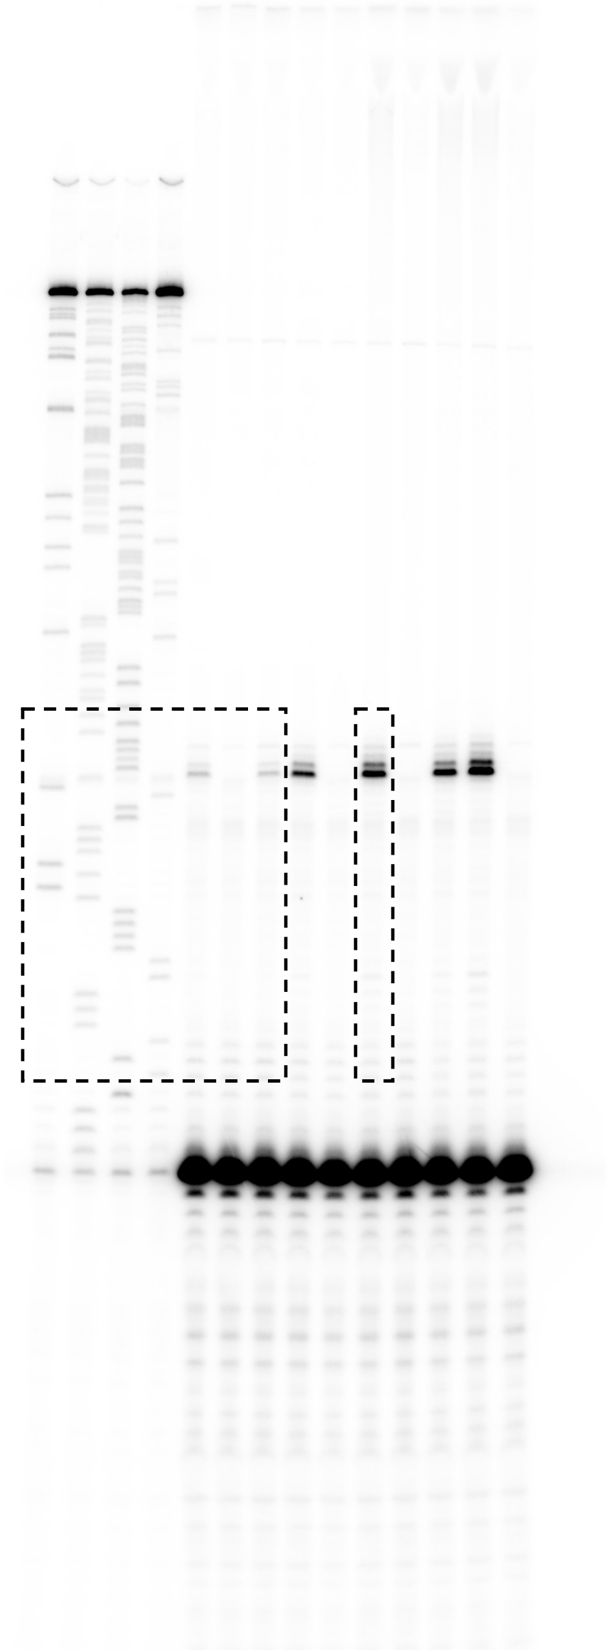
**

NB117

**
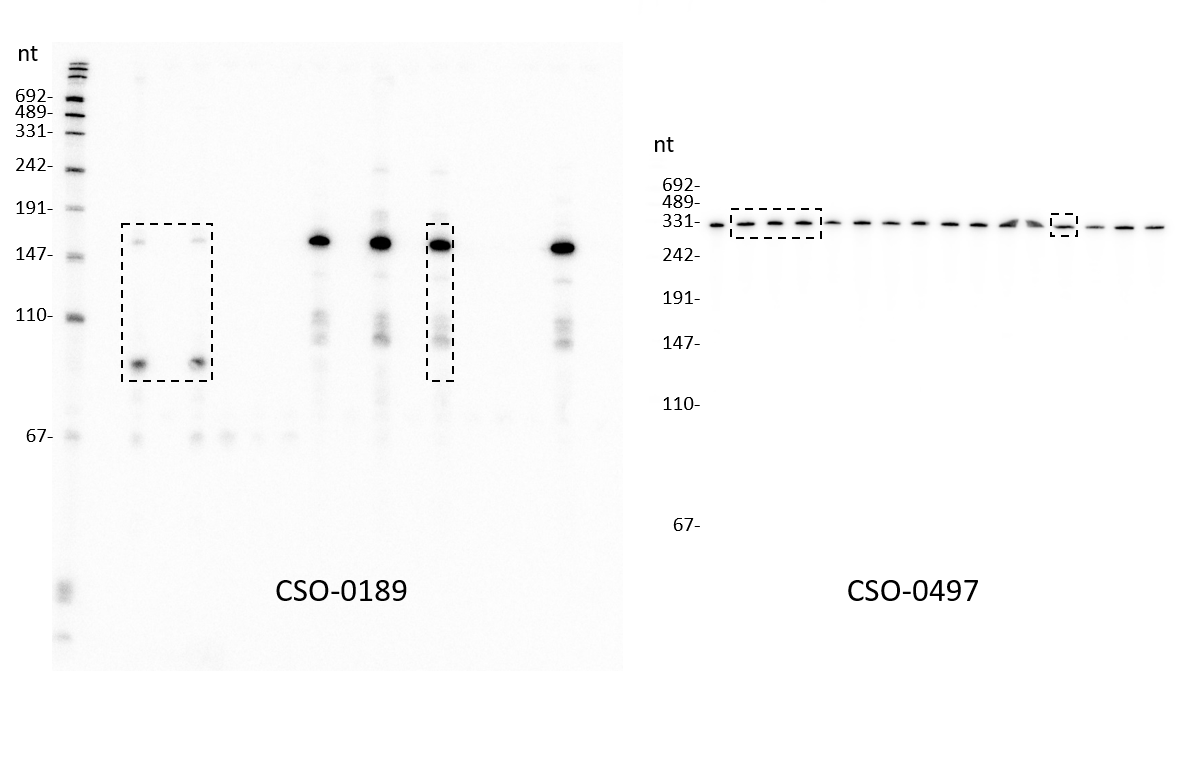
**

**Panel B**


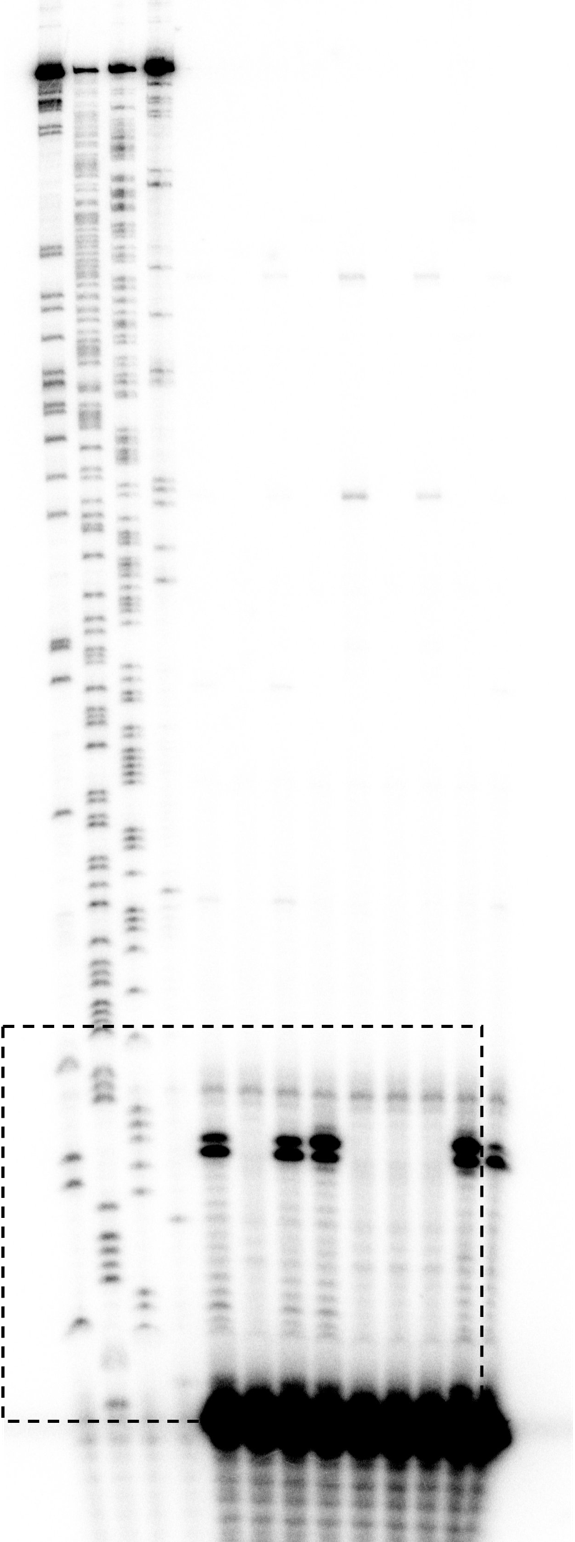


NB107

**
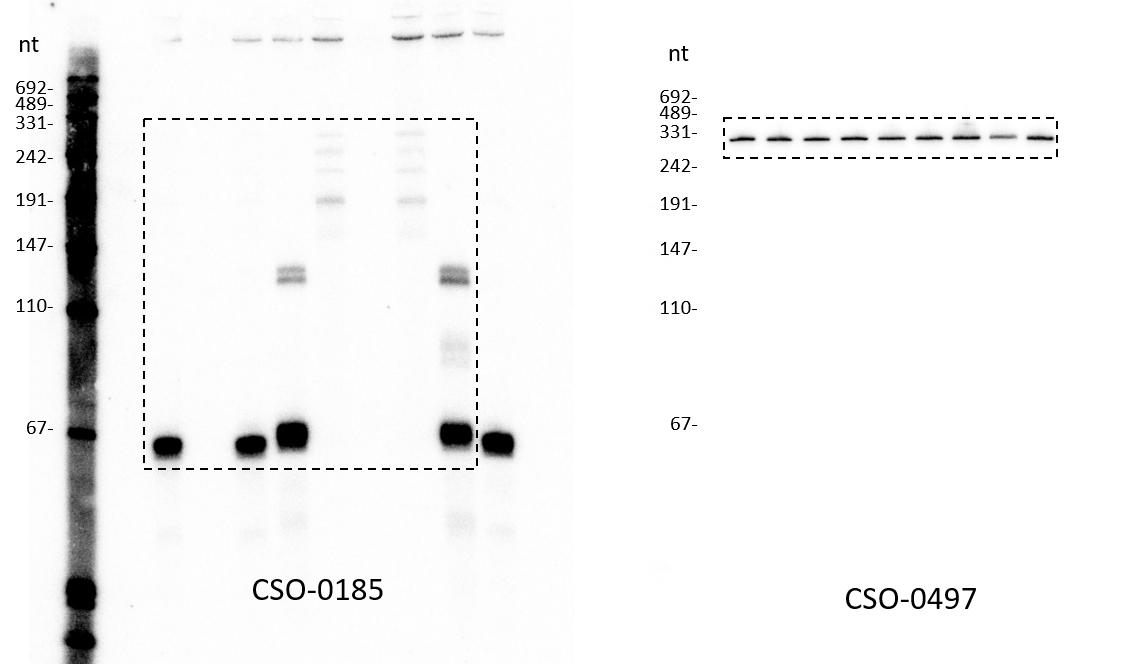
**

Supplement: fig1-figsupp2-data1 [file Source data - Figure 1 - Figure supplement 2.docx]

**Source data for Figure 3 – Figure supplement 2**

**Panel B**

NB119


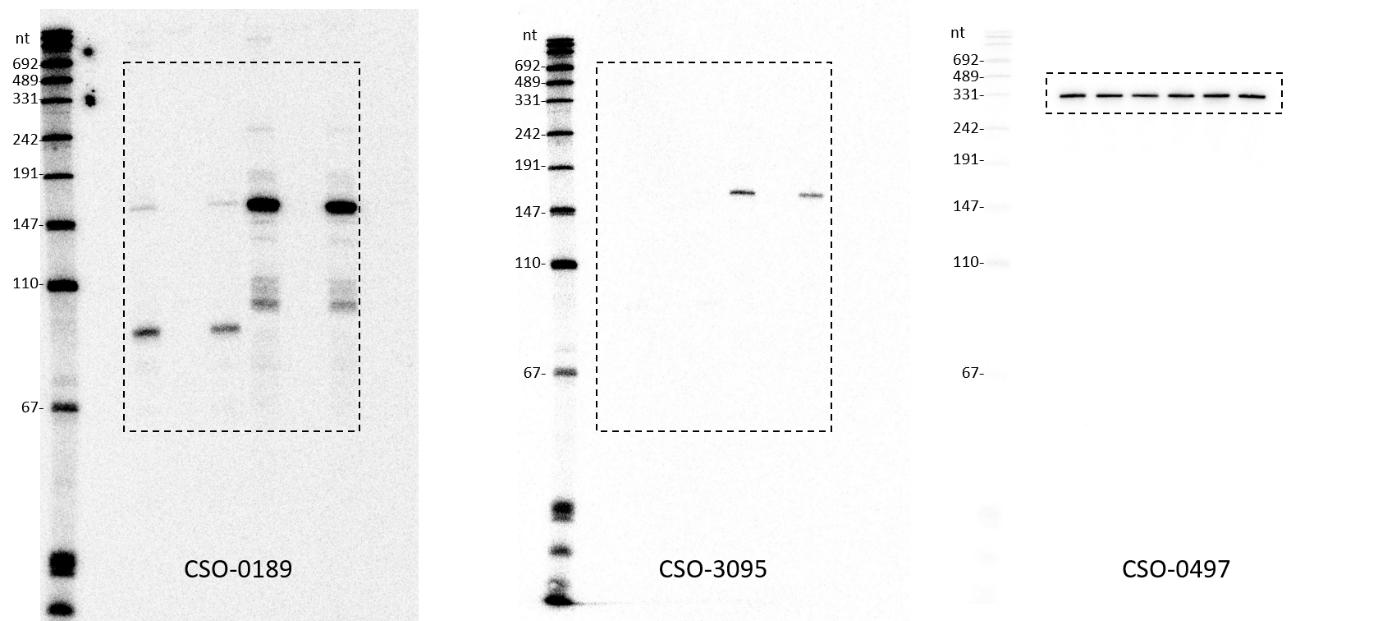


**Panel C**

NB207

**
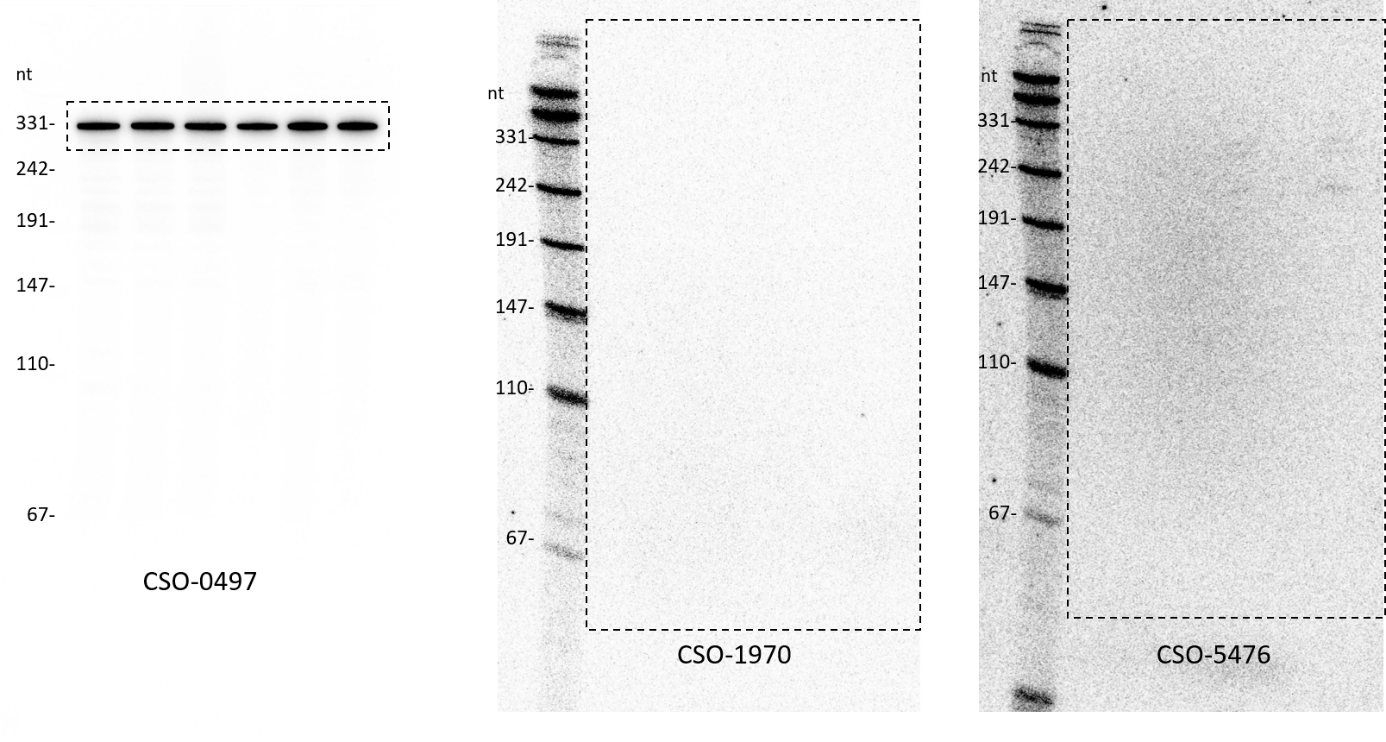
**

**NB208**

**
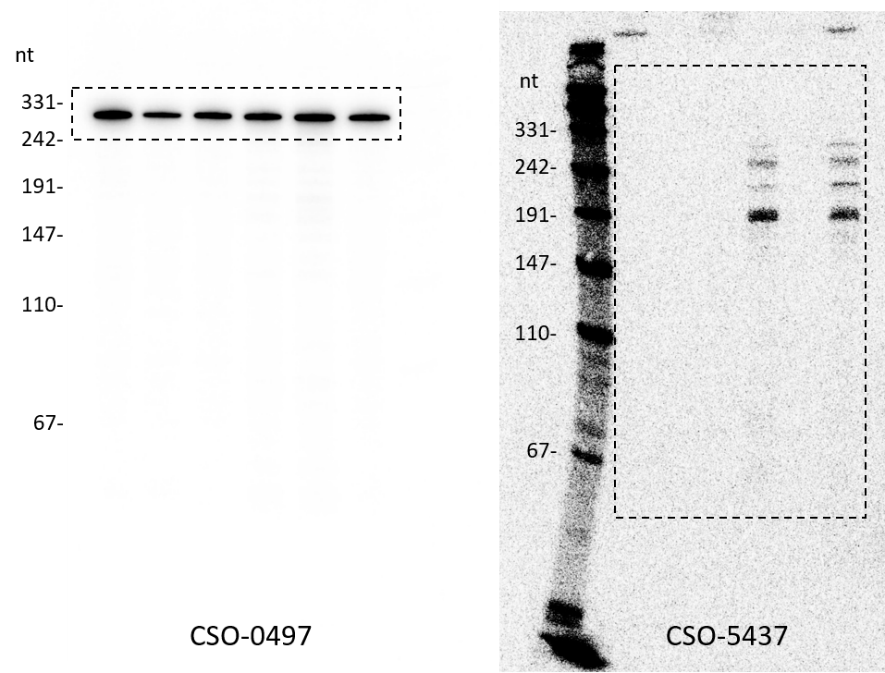
**

NB119

***
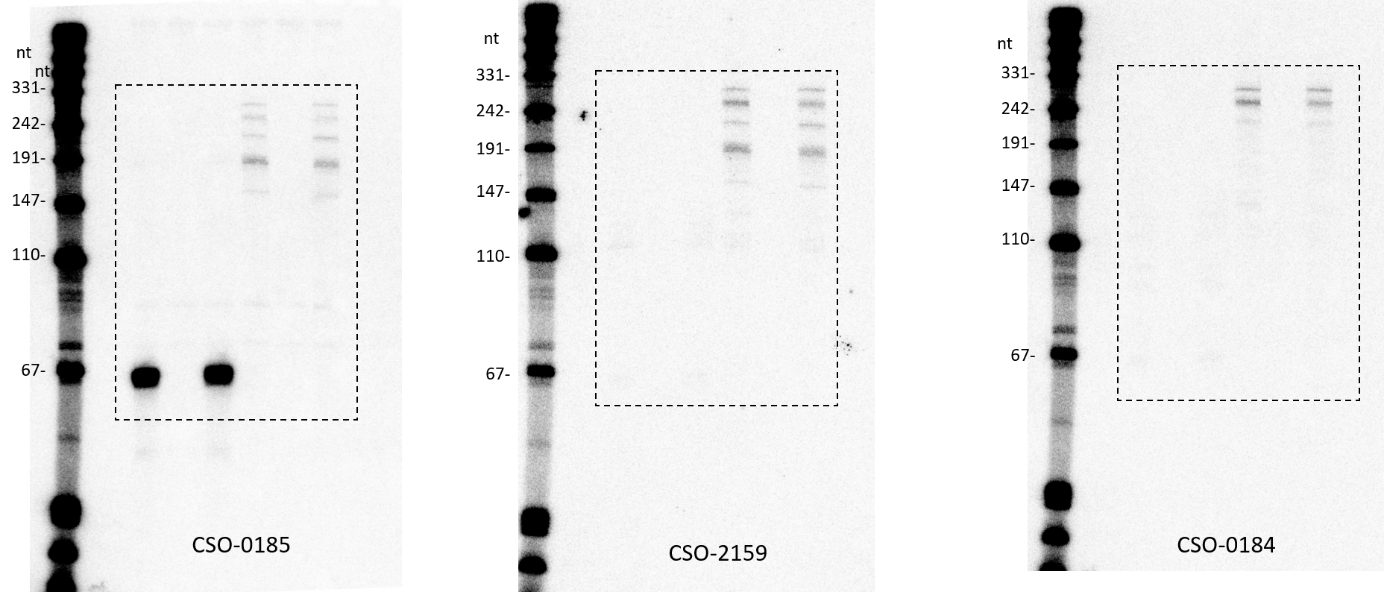
***

Supplement: fig3-figsupp2-data1 [file Source data - Figure 3 - Figure supplement 2.docx]

**Source data Figure 3 – figure supplement 3**

**Panels A & B**


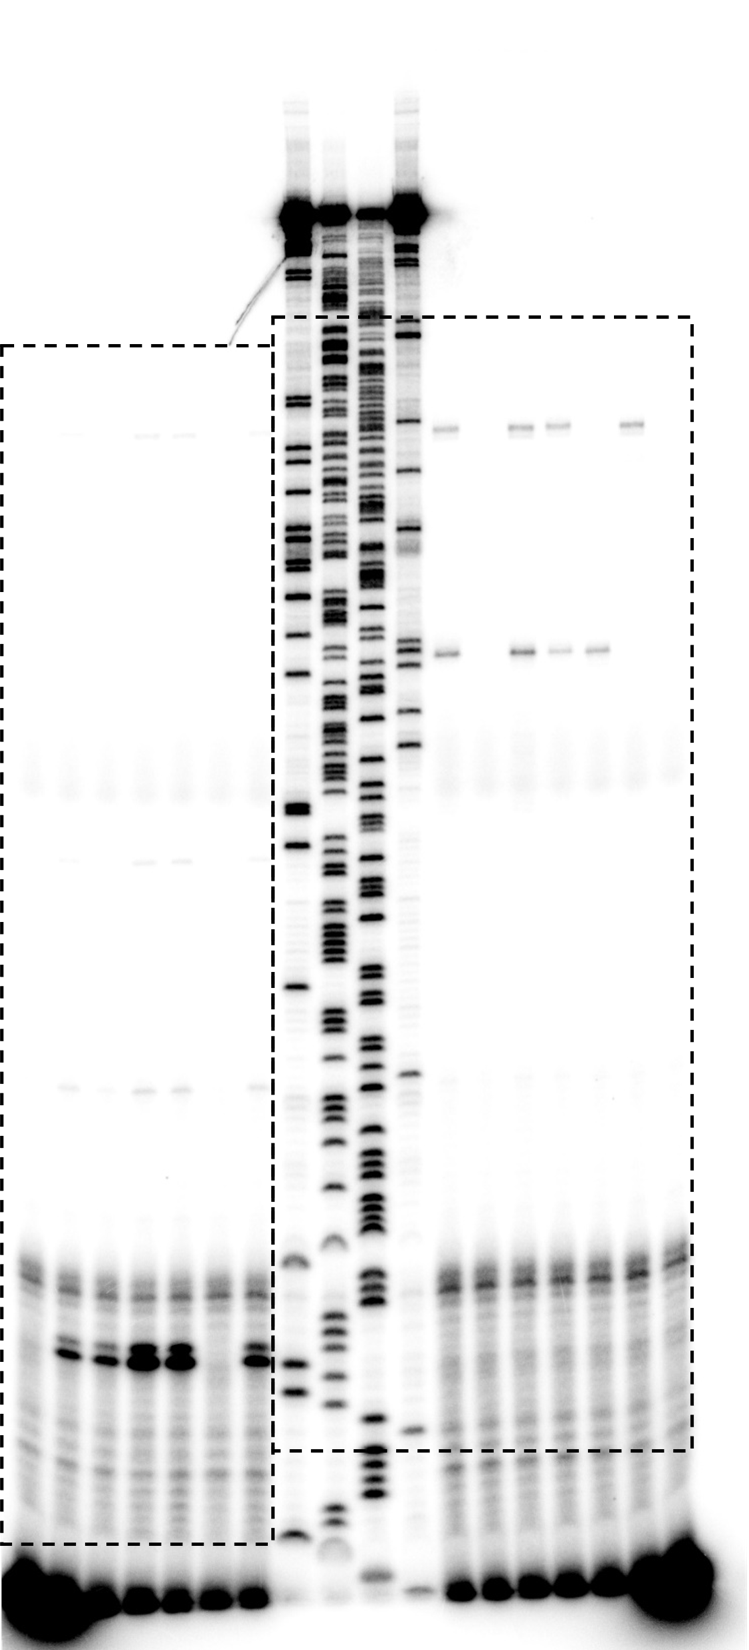

Supplement: fig3-figsupp3-data1 [file Source data - Figure 3 - Figure supplement 3.docx]

**Source data for Figure 5**

**Panel B**

NB205


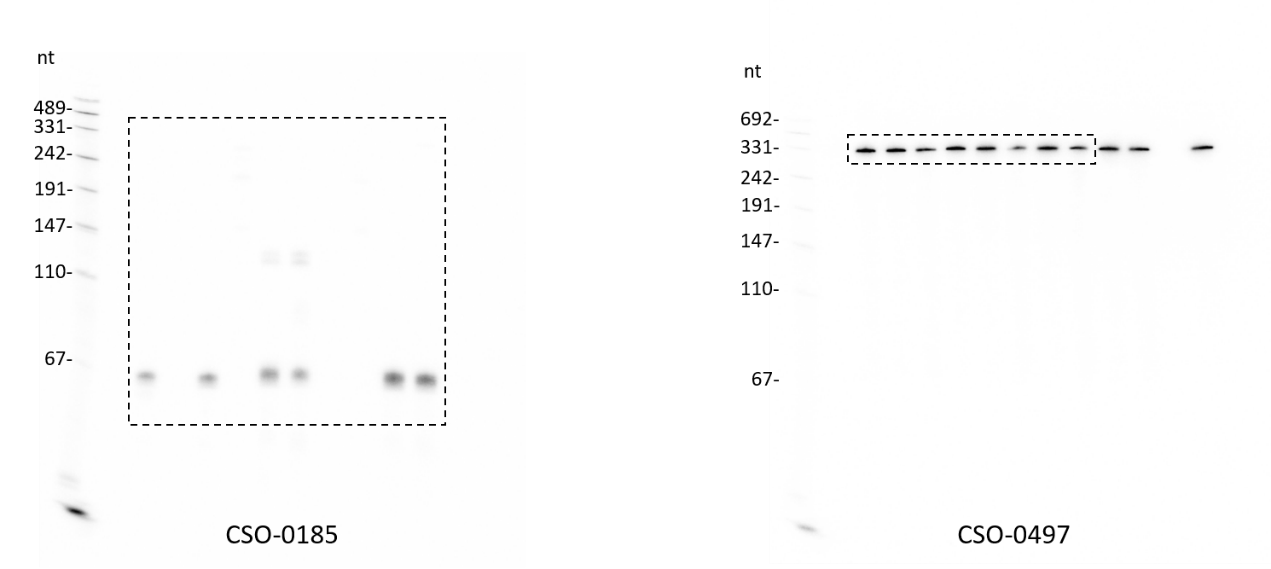

Supplement: fig5-data1 [file Source data - Figure 5.docx]

**Source data for Figure 5 – figure supplement 2**

**Panel B**


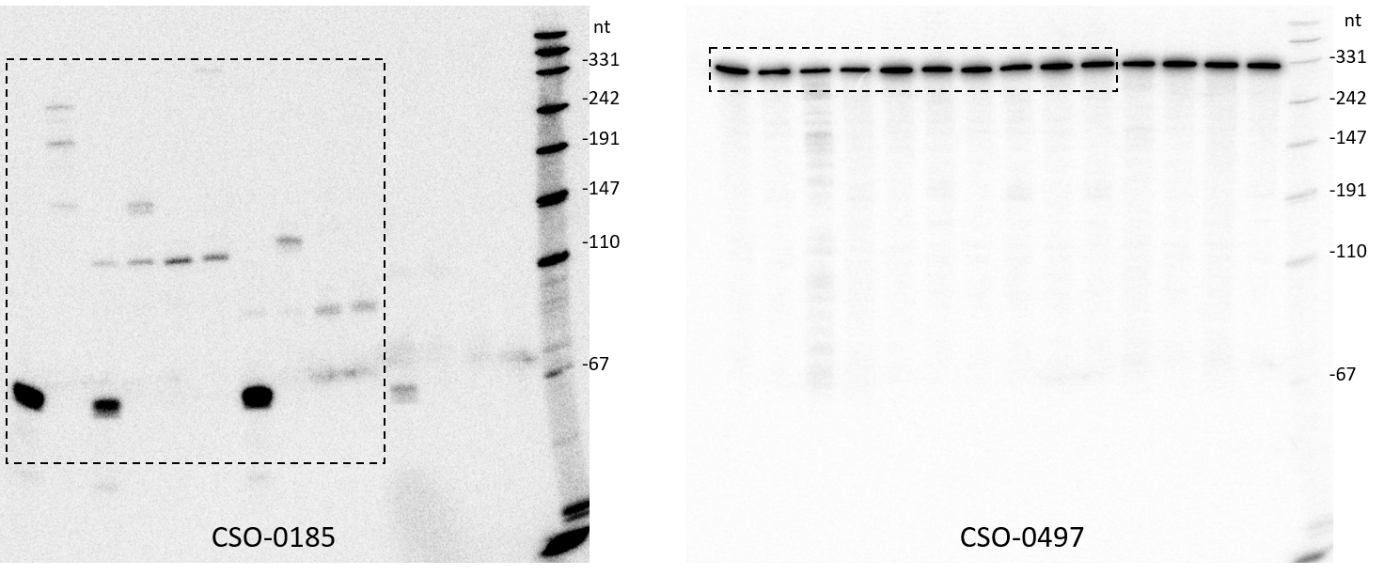

Supplement: fig5-figsupp2-data1 [file Source data - Figure 5 - figure supplement 2.docx]

**Source data for Figure 6**

**Panel B**


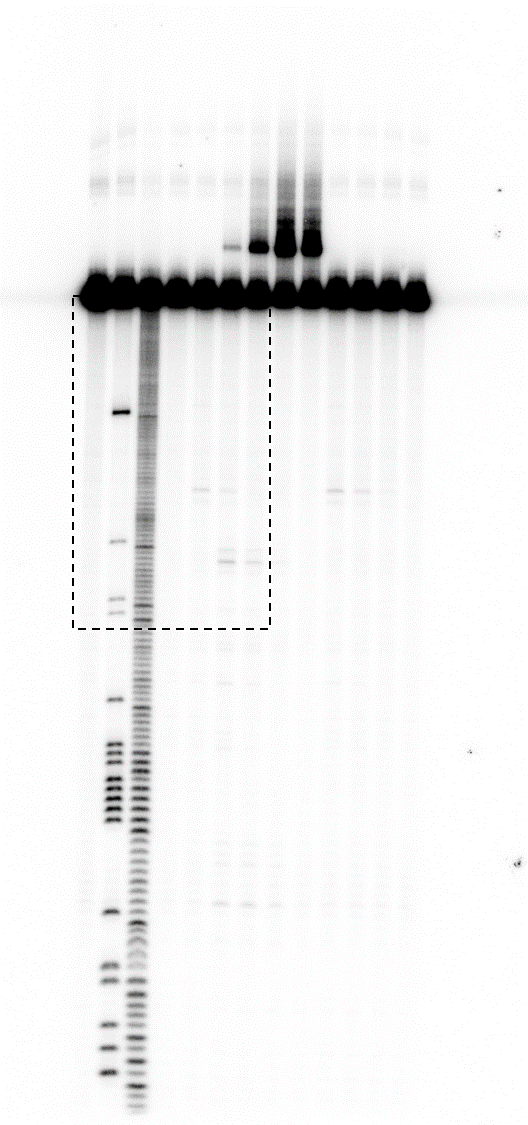

Supplement: fig6-data1 [file Source data - Figure 6.docx]

**Source data for Figure 6 – figure supplement 1**

**Panel B**


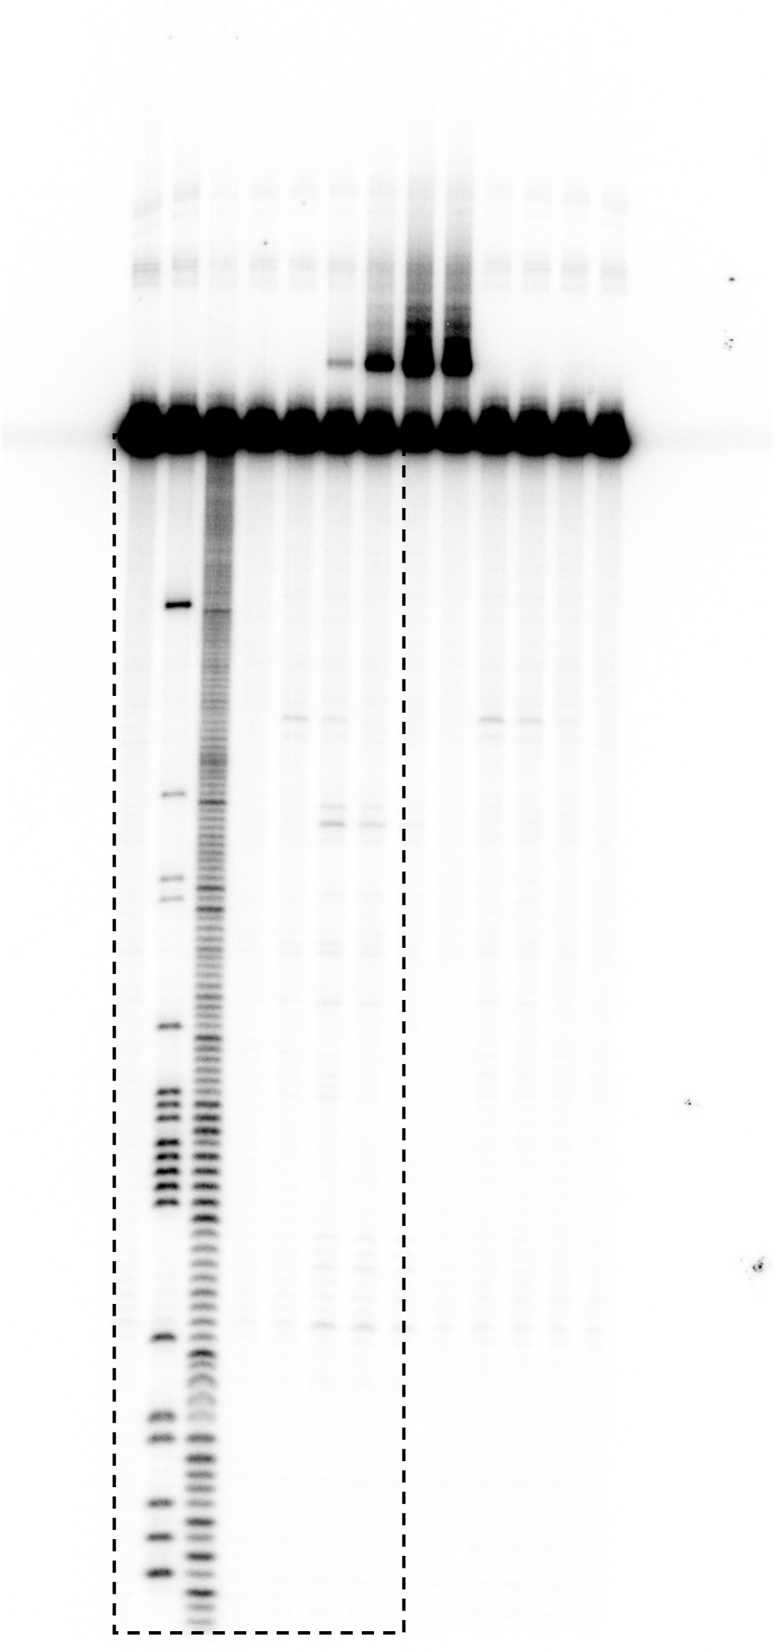

Supplement: fig6-figsupp1-data1 [file Source data - Figure 6 - figure supplement 1.docx]
